# Supplementary material for: Bacterial Community- and Hospital-Acquired Pneumonia in Patients with Critical COVID-19—A Prospective Monocentric Cohort Study
Source: MDPI journal article supplement (doi:10.3390/antibiotics13020192), 2024-02-16
Supplement: s1 [file s1]

Supplement 1. The ability of inflammatory markers to predict CAP analysis.

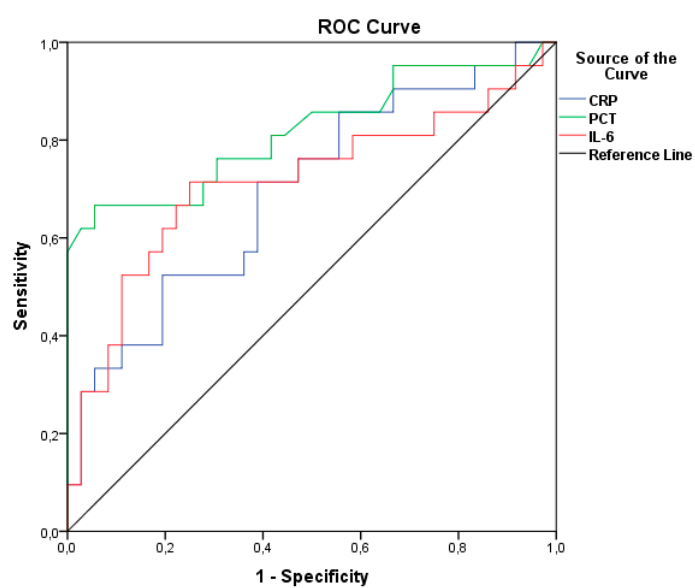

**Area Under the Curve**

| Test Result Variable(s) | Area  | p <sup>b</sup> | Asymptotic 95% Confidence Interval |             |
|-------------------------|-------|----------------|------------------------------------|-------------|
|                         |       |                | Lower Bound                        | Upper Bound |
| CRP                     | 0.696 | 0.014          | 0.552                              | 0.839       |
| PCT                     | 0.818 | 0.0001         | 0.690                              | 0.946       |
| IL-6                    | 0.714 | 0.007          | 0.562                              | 0.867       |

b. Null hypothesis: true area = 0.5

Supplement 2. The ability of initial values of PCT and IL-6 to predict HAP analysis.

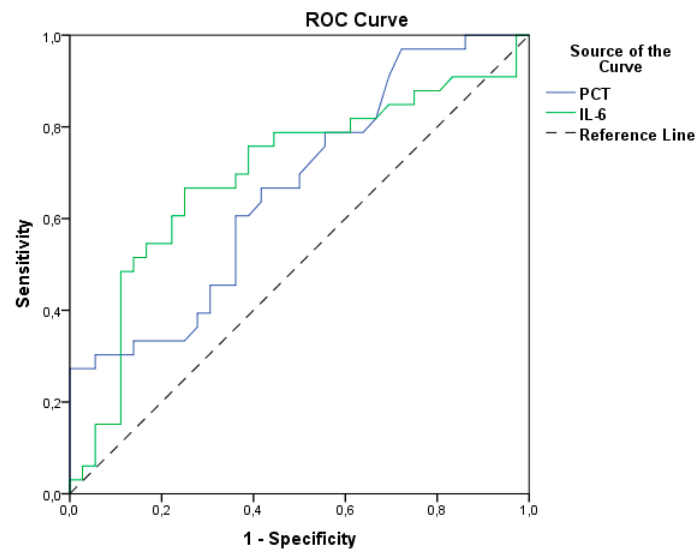

**Area Under the Curve**

| Test Result Variable(s) | Area         | p <sup>b</sup> | 95% CI for AUC |             |
|-------------------------|--------------|----------------|----------------|-------------|
|                         |              |                | Lower Bound    | Upper Bound |
| <b>PCT</b>              | <b>0.665</b> | 0.019          | 0.538          | 0.792       |
| <b>IL-6</b>             | <b>0.696</b> | 0.005          | 0.566          | 0.826       |

b. Null hypothesis: true area = 0.5

Supplement 3. Peak inflammatory markers in HAP-only and the No Bacterial Infection groups.

| Variables<br>peak values                | HAP-only<br>(n = 34) | NO BACTERIAL<br>INFECTIONS<br>(n = 36) | p-Value           |
|-----------------------------------------|----------------------|----------------------------------------|-------------------|
| CRP, mean (SD)                          | 224.3 (±111.6)       | 154.7 (±85.8)                          | <b>0.007</b>      |
| CRP change*, mean (SD)                  | 83.8 (±103.9)        | 6.76 (±64.24)                          | <b>0.0004</b>     |
| PCT, mean (SD)                          | 8.6 (±21.3)          | 3.2 (±10.1)                            | <b>0.0005</b>     |
| PCT change*, mean (SD)                  | 7.6 (±21.41)         | 2.89 (±9.9)                            | <b>0.003</b>      |
| IL-6, mean (SD)                         | 1711.3 (±4089.1)     | 90.1 (±142.8)                          | <b>&lt;0.0001</b> |
| IL-6 change*, mean (SD)                 | 1473.87 (±4032.9)    | 29.9 (±75.1)                           | <b>0.001</b>      |
| WBC x10 <sup>9</sup> , mean (SD)        | 20.1 (±9.2)          | 13.5 (±5.8)                            | <b>0.001</b>      |
| WBC x10 <sup>9</sup> change*, mean (SD) | 7.46 (±7.55)         | 4.28 (±5.8)                            | <b>0.026</b>      |
| temperature, mean (SD)                  | 37.9 (±1.0)          | 37.4 (±1.0)                            | <b>0.022</b>      |
| temp. change*, mean (SD)                | 0.7 (±1.4)           | 0.53 (±1.2)                            | 0.503             |

\* = peak value minus initial value

Supplement 4. The ability of peak values of PCT and IL-6 and their changes to predict HAP.

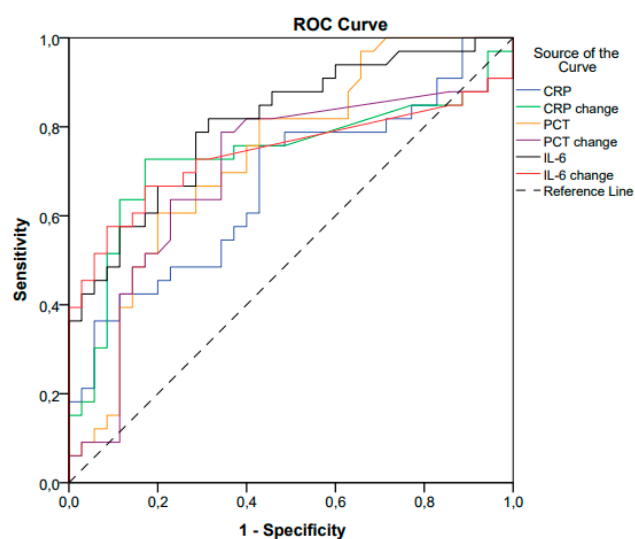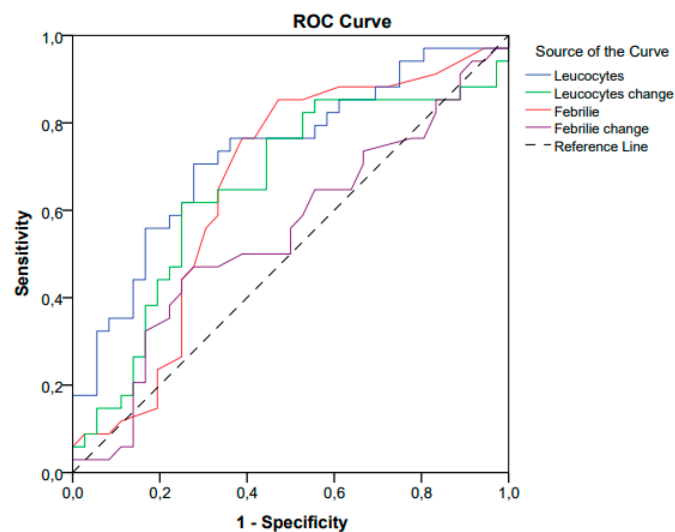

Area Under the Curve

| Test Result Variable(s) | Area | p <sup>b</sup> | 95% Confidence Interval |             |
|-------------------------|------|----------------|-------------------------|-------------|
|                         |      |                | Lower Bound             | Upper Bound |
| CRP (poor)              | .671 | .015           | .541                    | .801        |
| Change (fair)           | .733 | .001           | .604                    | .863        |
| PCT (fair)              | .734 | .001           | .615                    | .854        |
| Change (poor)           | .697 | .005           | .564                    | .829        |
| IL-6 (good)             | .810 | .000           | .708                    | .912        |
| Change (fair)           | .741 | .001           | .613                    | .870        |

b. Null hypothesis: true area = 0.5

Area Under the Curve

| Test Result Variable(s) | Area | p <sup>b</sup> | 95% Confidence Interval |             |
|-------------------------|------|----------------|-------------------------|-------------|
|                         |      |                | Lower Bound             | Upper Bound |
| WBC (fair)              | .730 | .001           | .610                    | .849        |
| Change (poor)           | .654 | .026           | .522                    | .787        |
| Temperature (poor)      | .659 | .022           | .526                    | .792        |

b. Null hypothesis: true area = 0.5
